# Supplementary material
Source: PubMed Central journal article supplement (PMC4082460)
Supplement: NIHMS589592-supplement-1.pdf [file NIHMS589592-supplement-1.pdf]

## Supplementary Figures and Tables

### Supplementary Figures

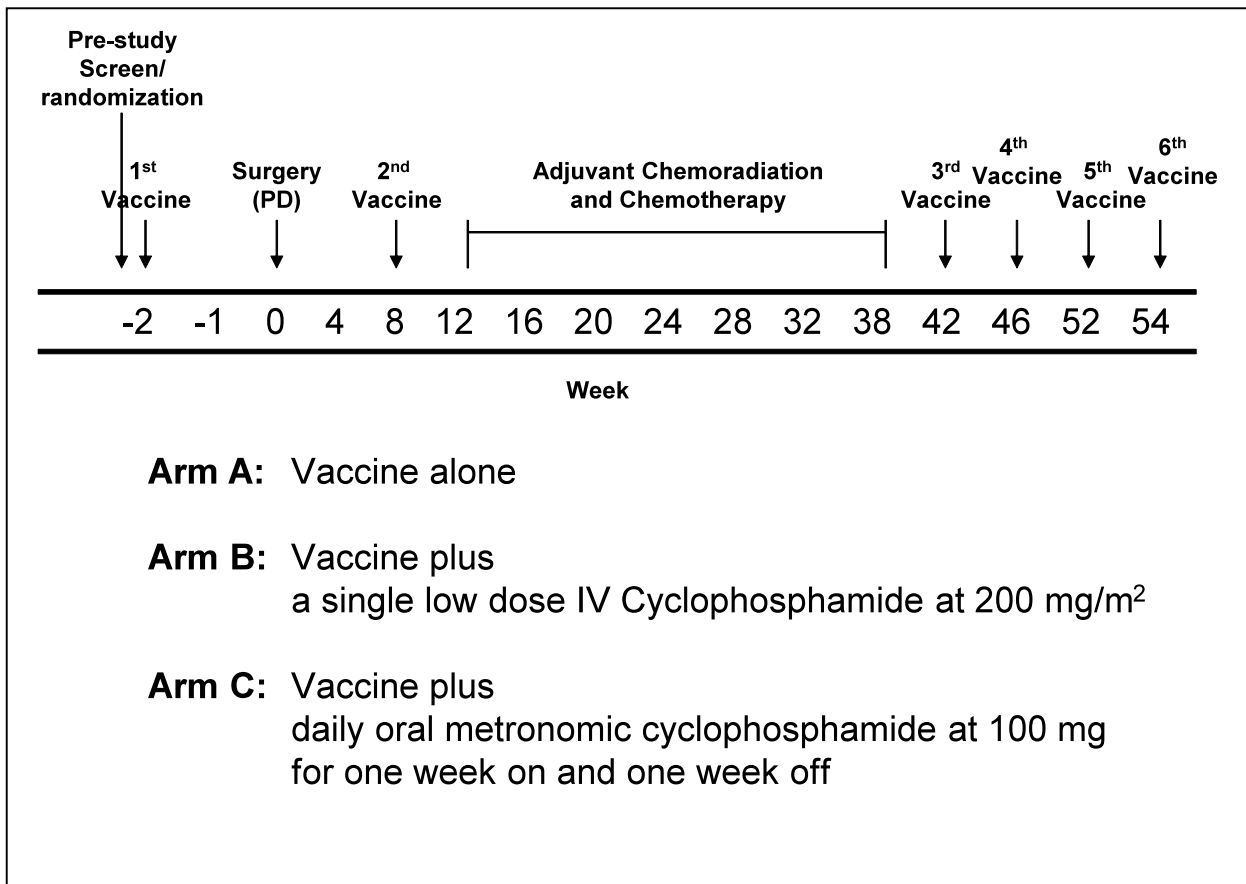

**Figure S1 Schema of the Neoadjuvant and Adjuvant Study of Panc GVAX**

Between July 2008 and September 2012, 59 patients were enrolled into an ongoing study of an irradiated, allogeneic GM-CSF-secreting pancreatic tumor vaccine (Panc GVAX) administered intradermally either alone or in combination with immune modulatory doses of cyclophosphamide (Cy) as neoadjuvant and adjuvant treatment for patients with resectable PDAC. Patients were randomized 1:1:1 to three treatment arms. In Arm A, patients received Panc GVAX alone; in Arm B, patients received Panc GVAX plus a single intravenous dose of Cy at 200 mg/m<sup>2</sup> one day prior to each vaccination; in Arm C, patients received Panc GVAX plus oral Cy at 100 mg once daily for one week on and one week off. Up to six Panc GVAX treatments were administered and all of the patients remained in their initial treatment arms throughout the duration of the study.

**A**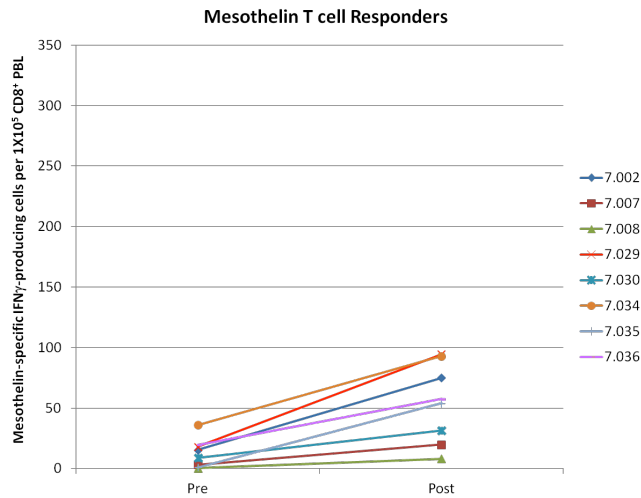**B**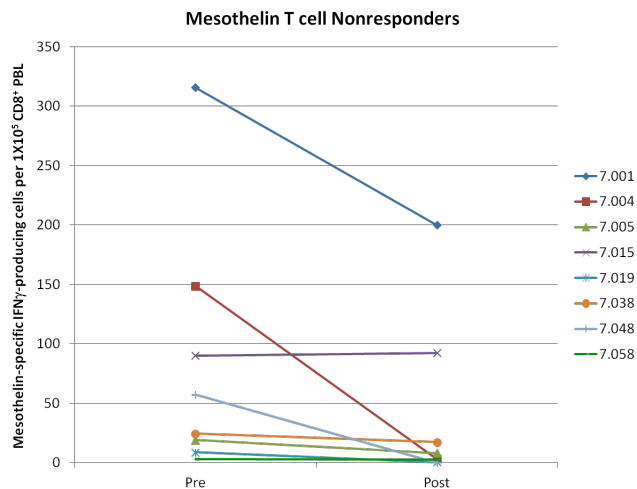

**Figure S2 Pre- and post-vaccination mesothelin peptide-specific T cell levels in responders versus nonresponders.** Mesothelin peptide-specific CD8<sup>+</sup> T cells were measured in peripheral blood lymphocytes collected prior to the first GVAX treatment (Pre) and 12-14 days following treatment just prior to surgery (Post) using IFN $\gamma$  ELISPOT assays as previously described by Lutz et al<sup>1</sup>. **A.** Mesothelin-specific T-cell levels measured in eight patients who demonstrated enhanced post-vaccination mesothelin-specific responses. **B.** Mesothelin-specific T-cell levels measured in eight patients who did not demonstrate enhanced post-vaccination mesothelin-specific responses.

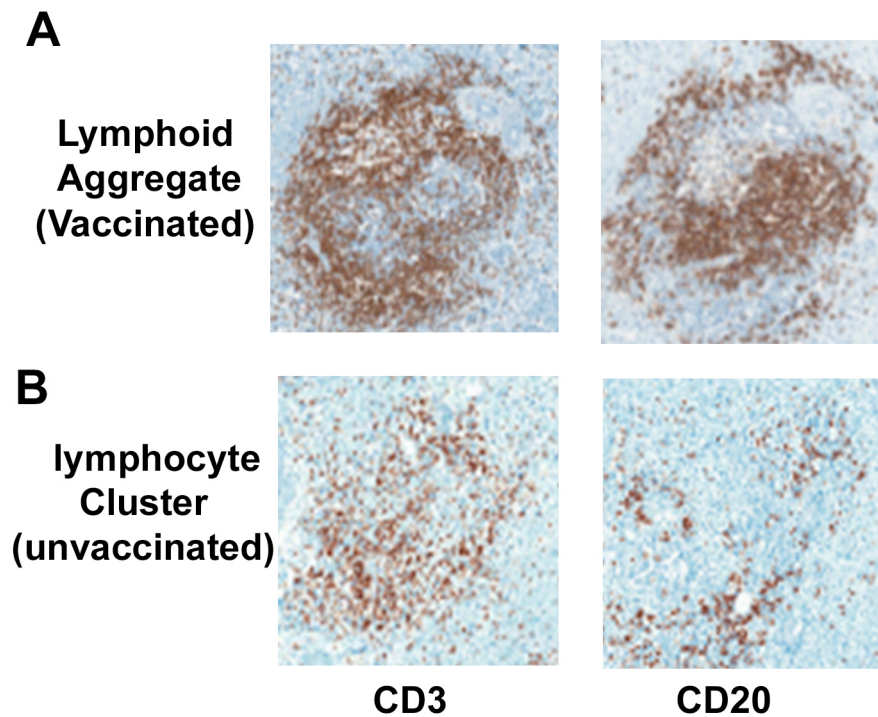

**Figure S3 Intratumoral tertiary lymphoid aggregate in PDACs from patients treated with GVAX and lymphocyte cluster in PDACs from patients not treated with GVAX. A.**

Representative intratumoral tertiary lymphoid aggregate from patients treated with GVAX (vaccinated). Tertiary lymphoid aggregates are composed of organized T cell zone (marked by anti-CD3 staining) and B cell zone (marked by anti-CD20 staining). **B.** Occasionally, lymphocyte clusters lacking organization of T cells and B cells were seen in PDACs from patients not treated with GVAX (unvaccinated).

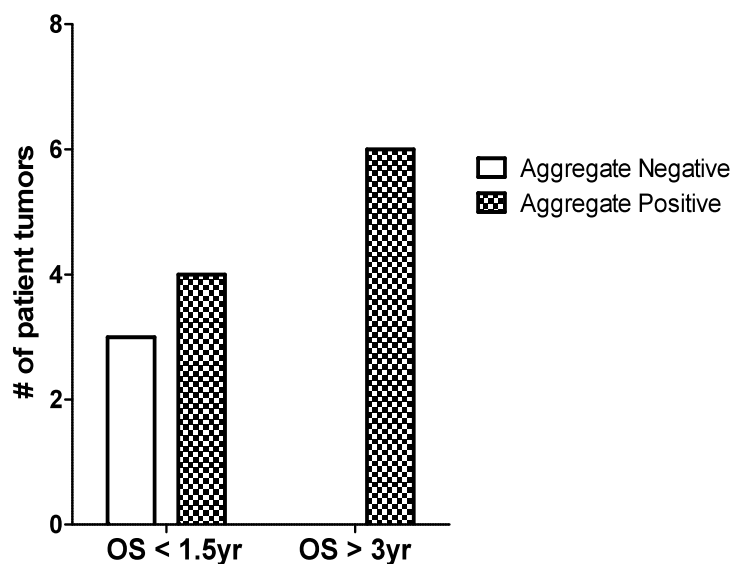

**Figure S4 The development of post-vaccination intratumoral lymphoid aggregates is associated with survival.**

Numbers of PDACs with or without at least one lymphoid aggregate present in the intratumoral area from patients who survived greater than 3 years (OS>3yr) (n=6) and patients who survived less than 1.5 years (OS<1.5yr) (n=7). The presence of intratumoral lymphoid aggregates is associated with but not an absolute predictor of longer survival (Chi-square p=0.069).

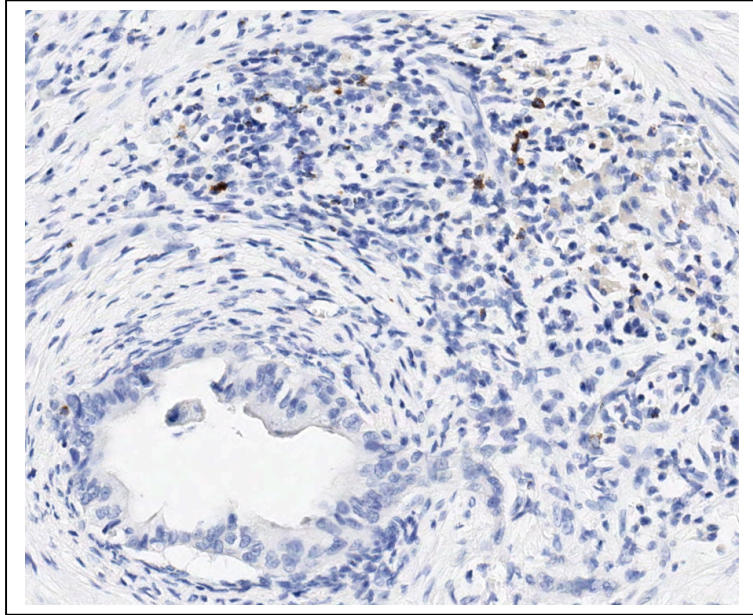

**Figure S5 Relatively more Granzyme B expressing cells observed outside of the lymphoid aggregates.** IHC staining of Granzyme B in a representative cluster of lymphocytes located near tumor cells but outside of lymphoid aggregates is shown.

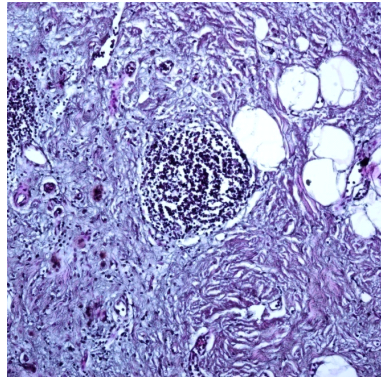

**Before dissection**

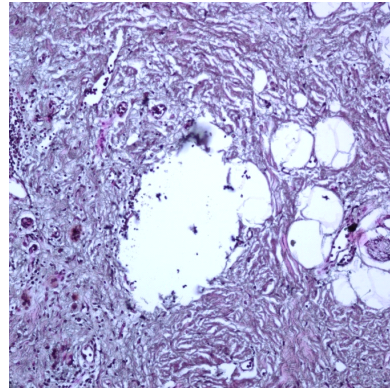

**After dissection**

**Figure S6 Microdissection of Lymphoid Aggregates for Microarray Analysis.**

Lymphoid aggregates were isolated from 14 paraffin-embedded PDAC specimens by microdissection. Images of the same H&E stained PDAC tissue sample prior to and following microdissection for one representative intratumoral lymphoid aggregate are shown.

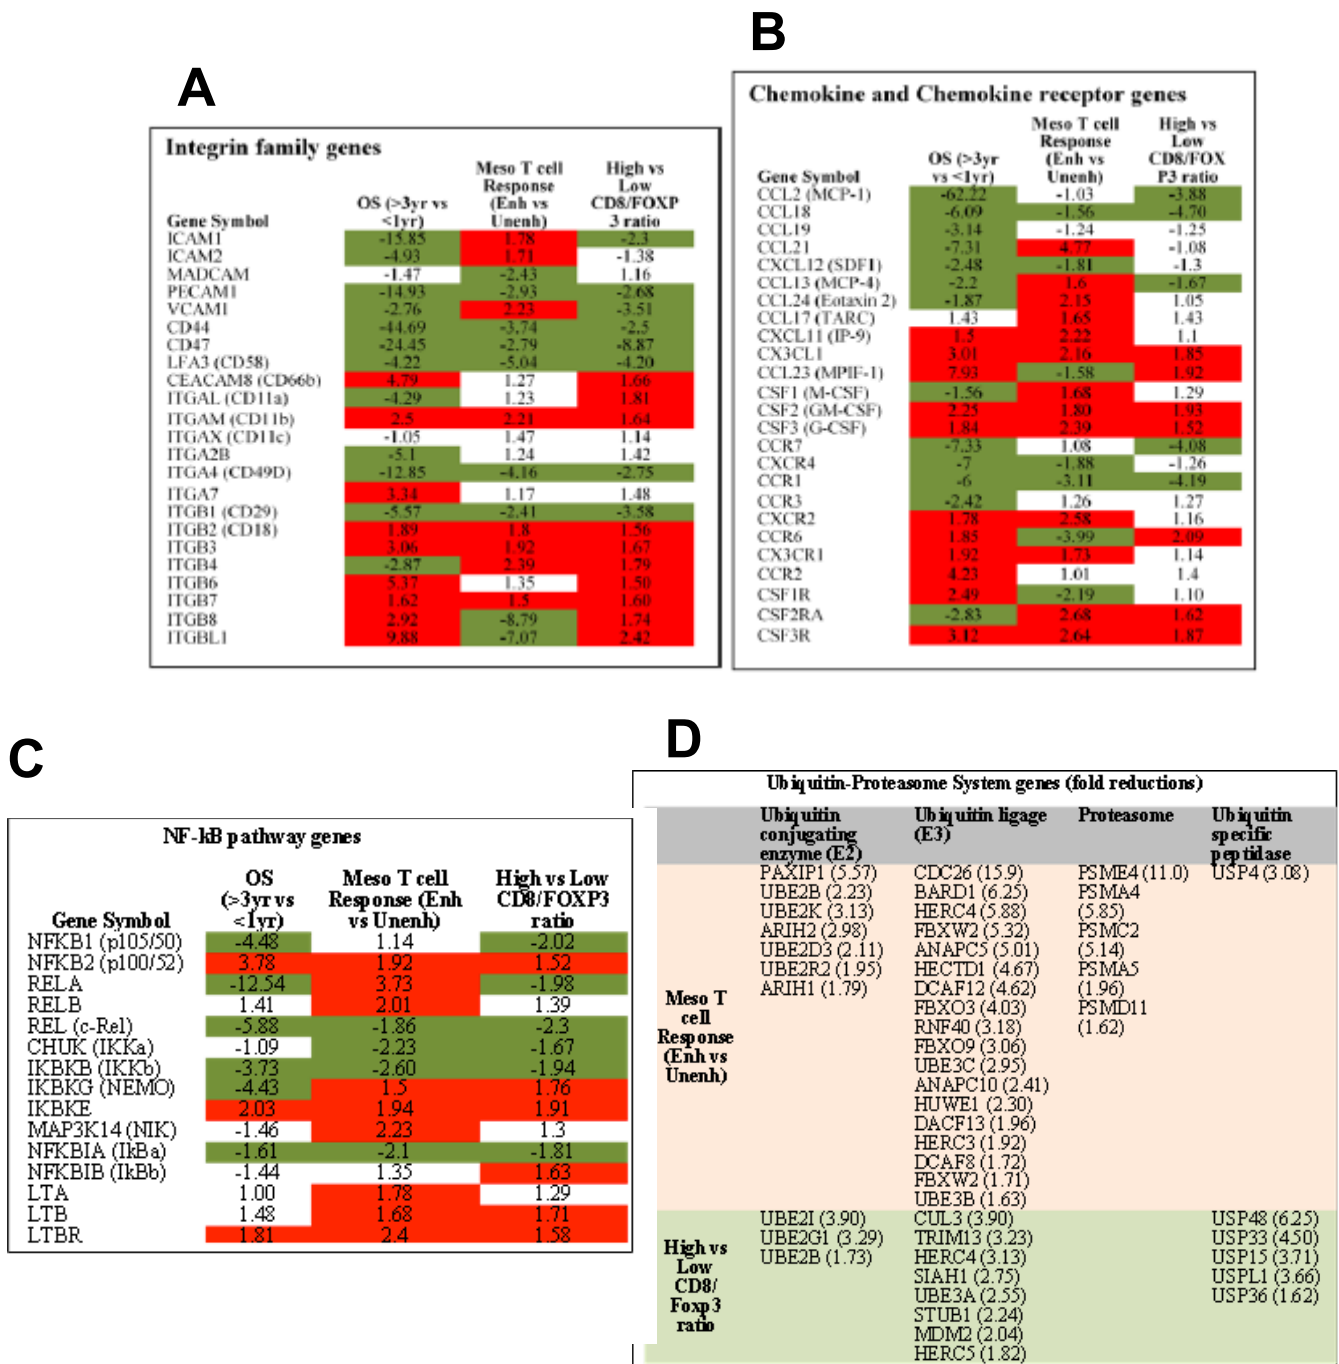

**Figure S7** Microarray analysis of lymphoid aggregates revealed gene signatures in four pathways involved in regulating immune cell trafficking and function. Microarray gene expression was compared between microdissected lymphoid aggregates from patient tumors using the same groups as described for **Figure 4**. Gene ontology analysis revealed enrichment of differentially expressed genes in the **(A)** integrin family, **(B)** chemokine and chemokine receptor

family and **(C)** the NF $\kappa$ B pathway and **(D)** down-regulated genes in the ubiquitin-proteasome system (UPS) The linear fold-changes in expression for each comparison are shown for individual genes. For integrin, chemokine and chemokine receptor, and NF $\kappa$ B pathway genes, greater than 1.5-fold increases in gene expression are highlighted in red and greater than 1.5-fold decreases in gene expression are highlighted in green. For the UPS, specific genes that were downregulated are shown with respective fold reductions in expression.



| Treg pathway genes (OS, overall survival) |                    |                        |                              |
|-------------------------------------------|--------------------|------------------------|------------------------------|
| Gene Symbol                               | OS>3yr vs. OS<1 yr | Enh T cell vs. not Enh | High vs Low CD8 /FOXP3 ratio |
| TGFB1                                     | 1.66               | 1.33                   | 1.69                         |
| TGFB11I                                   | -13.22             | -1.65                  | -6.34                        |
| TGFB2                                     | -1.39              | 1.21                   | 1.22                         |
| TGFB3                                     | -1.34              | 1.44                   | 1.19                         |
| TGFBI                                     | -2.17              | 1.06                   | -1.75                        |
| TGFBR1                                    | 1.22               | -7.24                  | -1.24                        |
| TGFBR2                                    | -1.74              | -1.32                  | -1.26                        |
| TGFBR3                                    | -2.26              | -2.02                  | -1.66                        |
| TGFBRAP1                                  | -4.41              | 1.71                   | -1.2                         |
| Smad2                                     | -1.82              | -4.19                  | -1.64                        |
| Smad3                                     | -9.18              | 1.11                   | -2.13                        |
| smad4                                     | -12.74             | -2.10                  | -6.94                        |
| IL10                                      | 1.84               | 1.59                   | 1.12                         |
| stat5                                     | -2.27              | -1.5                   | 2.22                         |
| FOXP3                                     | -3.13              | -1.05                  | -1.6                         |

  

| TH17 pathway genes |       |       |       |
|--------------------|-------|-------|-------|
| IL17A              | 7.61  | 1.35  | 1.65  |
| IL17F              | -1.02 | 1.81  | 1.11  |
| IL17RA             | 3.53  | -1.03 | 1.52  |
| IL17RC             | 2.12  | 1.94  | 1.48  |
| IL23A              | 2.79  | 1.68  | 1.78  |
| IL23R              | 2.43  | 1.94  | 1.79  |
| IL21               | 2.40  | 1.03  | 1.41  |
| IL22               | 2.13  | 1.47  | 1.67  |
| IL1A               | 2.98  | 1.38  | 1.07  |
| TGFB1              | 1.66  | 1.33  | 1.69  |
| IL6                | -3.53 | 1.20  | -1.91 |
| RUNX1              | 1.98  | 1.5   | 1.25  |
| RORA               | 3.49  | -4.99 | 1.61  |
| RORgt              | -1.74 | 1.62  | 1.11  |
| stat3              | -8.22 | -7.28 | -4.98 |

**Figure S8 Decreased Treg and increased TH17 pathway gene expression signatures are associated with improved post-vaccination responses.**

Gene expression measured by microarray was compared between microdissected lymphoid aggregates from patient tumors using the same groups as described for **Figure 4**. Gene ontology analysis revealed enrichment of downregulated genes in the Treg pathway and enrichment of upregulated genes in the TH17 pathway. The linear fold-change in expression for each comparison is shown for representative genes in each pathway. Greater than 1.5-fold increases in gene expression are highlighted in red and greater than 1.5-fold decreases in gene expression are highlighted in green.

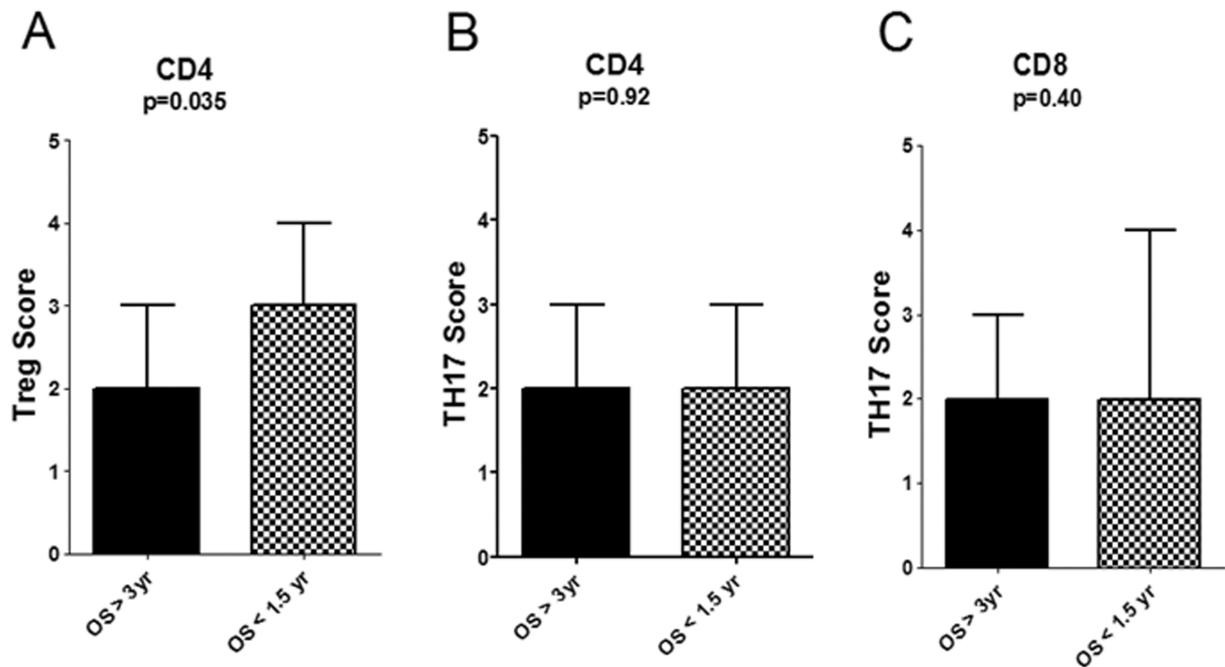

**Figure S9 Downregulation of Treg pathway gene expression in TIL following treatment with PDAC GVAX is associated with longer survival.**

Freshly thawed and unstimulated TIL specimens were sorted using a flow cytometer to obtain CD4<sup>+</sup> and CD8<sup>+</sup> T cells. For some TIL specimens, CD4<sup>-</sup>CD8<sup>-</sup> non-T cells and/or CD19<sup>+</sup> B cells were also obtained. We performed quantitative real-time RT-PCR analysis for a panel of immune related genes in the TH1, TH2, Treg and TH17 pathways (**Table S2**). The expression level of each pathway gene was normalized as described in the methods section. The average score for genes in each pathway were compared between the different patient groups. Treg pathway (**A**) and TH17 pathway (**B**) scores in CD4<sup>+</sup> TIL and TH17 scores in CD8<sup>+</sup> TIL (**C**), were compared between patients who survived >3 years (n=5) and those who survived <1.5 years (n=6). Medians and ranges are shown for each group. P values calculated using Wilcoxon signed-rank tests are shown for each comparison.

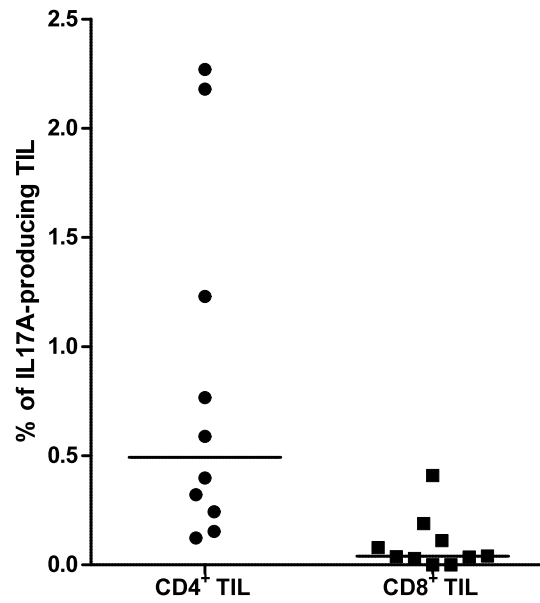

**Figure S10** IL17A-producing T cells are present in low levels in TIL from PDAC GVAX treated patients.

IL17A cytokine-producing T cells were quantified in TIL isolated from ten PDAC GVAX-treated patients following overnight stimulation with anti-CD3 and anti-CD28. Percentages of CD4<sup>+</sup> IL17A-producing and CD8<sup>+</sup> IL17A-producing TIL are shown.

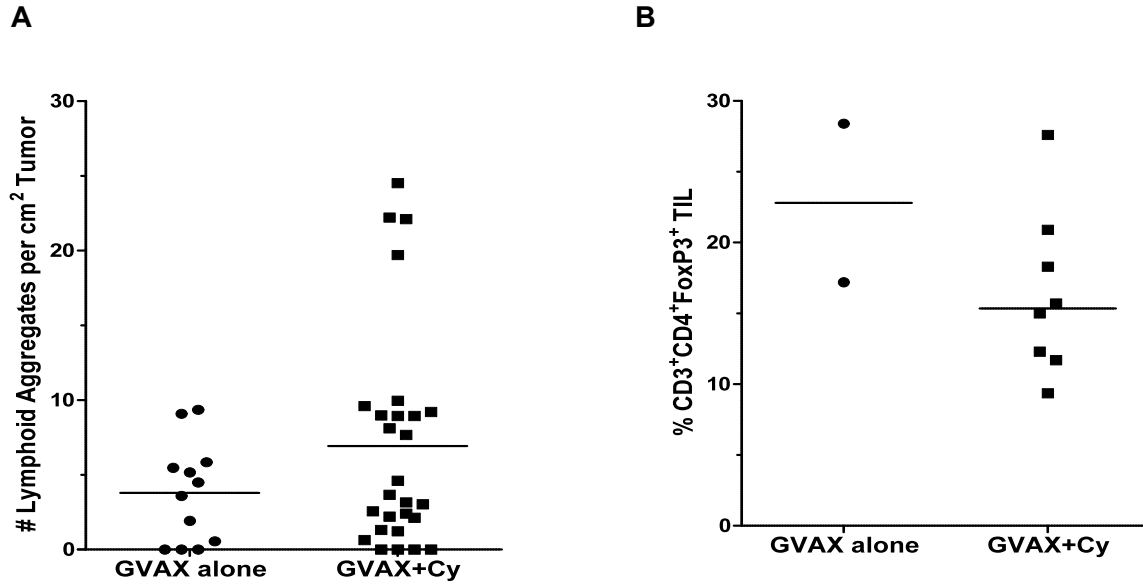

**Figure S11 Treatment with low dose Cy increases post-vaccination densities of intratumoral lymphoid aggregates and reduces Treg levels in the PDAC TME.**

**A.** Intratumoral lymphoid aggregate densities in PDACs from patients treated with GVAX alone compared to GVAX plus low dose Cy. Each symbol represents an individual patient tumor sample and means for each treatment group are shown. **B.** Levels of CD3<sup>+</sup>CD4<sup>+</sup>FoxP3<sup>+</sup> Tregs measured by FACS in TIL isolated from two patients who received GVAX alone and eight patients who received GVAX plus Cy. Each symbol represents an individual TIL sample and medians for each group are shown.

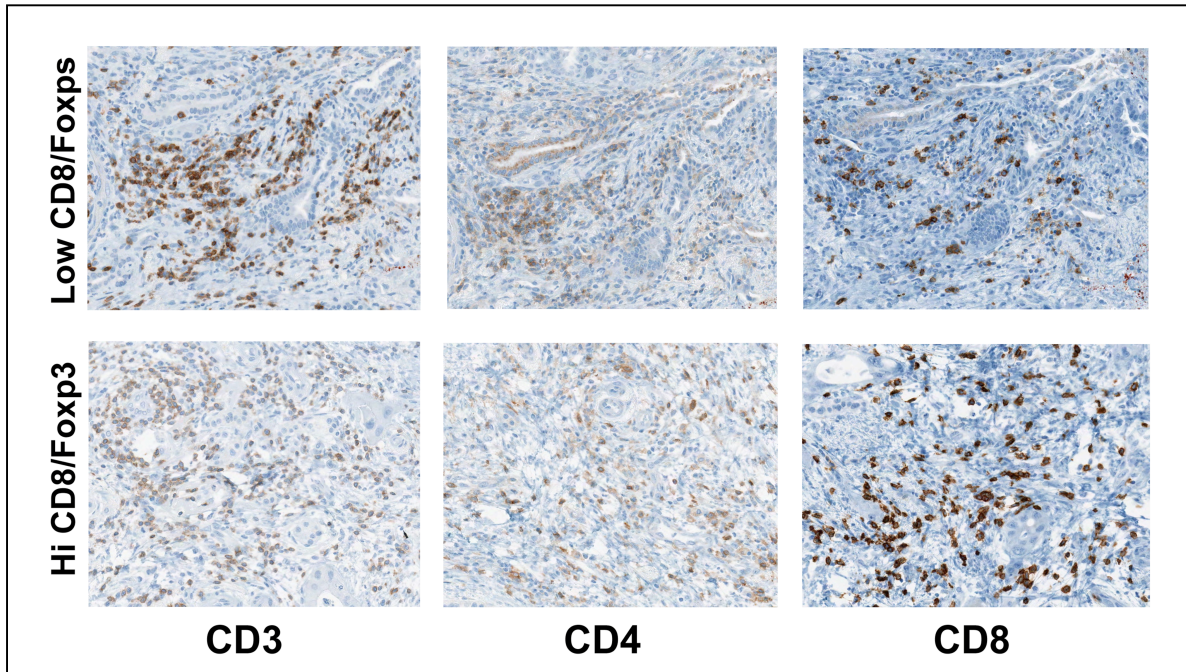

**Figure S12 T cell infiltration in PDACs with low versus high CD8/Foxp3 ratio.** IHC staining of CD3, CD4, and CD8 in representative PDAC tumor areas from a patient treated with the GVAX vaccine alone who had a low Teffector:Treg ratio in the TME compared to a patient treated with GVAX plus Cy who had a high Teffector:Treg ratio in the TME.

## Supplementary Tables

**Table S1 Immunohistochemistry protocols**

| Marker     | Vendor                   | Isotype            | Protocol                          |                                                    |
|------------|--------------------------|--------------------|-----------------------------------|----------------------------------------------------|
|            |                          |                    | Epitope Retrieval (ER) Conditions | Dilution and incubation time of primary antibodies |
| CD3        | Ventana                  | Rabbit, IgG        | Ventana protocol                  |                                                    |
| CD4        | Ventana                  | Rabbit, IgG        | Ventana protocol                  |                                                    |
| CD8        | Ventana                  | Mouse, IgG1        | Ventana protocol                  |                                                    |
| CD20       | Ventana                  | Mouse, IgG2a       | Ventana protocol                  |                                                    |
| CD56       | Ventana                  | Mouse, IgG1        | Ventana protocol                  |                                                    |
| CD1a       | Novocastra               | Mouse, IgG1        | EDTA ER, 95°C x 20 min            | 1:50, 15 min                                       |
| CD83       | Leica                    | Mouse, IgG1        | Citrate ER, 95°C x 10 min         | 1:50, 15 min                                       |
| DC-LAMP    | Dendritics               | Mouse, IgG1        | EDTA ER, 95°C x 20 min            | 1:50, 30 min                                       |
| T-Bet      | Santa Cruz               | Mouse, IgG1        | EDTA ER, 95°C 20 min              | 1:50, 30 min                                       |
| CD45RA     | Dako                     | Mouse, IgG1        | Ventana protocol                  |                                                    |
| CD45RO     | Dako                     | Mouse, IgG2a       | Ventana protocol                  |                                                    |
| Granzyme B | Leica                    | Mouse, IgG2a       | EDTA ER, 95°C x 20 min            | 1:50, 15 min                                       |
| CXCR3      | BD Pharmingen            | Mouse, IgG1        | EDTA ER, 95°C x 20 min            | 1:500, 30 min                                      |
| FoxP3      | Abcam                    | Mouse, IgG1        | EDTA ER, 95°Cx 20 min             | 1:100, 15 min                                      |
| PD-1       | R&D                      | Goat, polyclonal   | Citrate ER, 95°C x 20 min         | 1:25, 30 min                                       |
| CD163      | Novocastra               | Mouse, IgG1        | EDTA ER, 95°C x 10 min            | 1:500, 15 min                                      |
| CD69       | Abcam                    | Mouse, IgG1        | EDTA ER, 95°C x 20 min            | 1:25, 30 min                                       |
| CCL21      | R&D                      | Goat, polyclonal   | Citrate ER, 95°C x 20 min         | 1:25, 30 min                                       |
| Ki67       | Novocastra               | Rabbit, IgG        | EDTA ER, 95°C x 20 min            | 1:100, 15 min                                      |
| CD21       | Dako                     | Mouse              | Enzyme ER, 95°C x 10 min          | 1:100, 15 min                                      |
| IL-17      | LSBio                    | Rabbit, polyclonal | Diva Decloaker<br>125°C x 30 sec  | 1:250, 30 min                                      |
| RORgT      | Millipore                | Mouse, IgG2a       | EDTA ER, 95°C x 20 min            | 1:200, 15 min                                      |
| Gata3      | Santa Cruz Biotechnology | Mouse, IgG1        | EDTA ER, 95°C x 20 min            | 1:25, 45 min                                       |

**Table S2 Quantitative real-time RT-PCR primers**

| Species                               | Gene Symbol | Gene Name                                           | Accession     | Product Size | Region    | Forward                | Reverse                |
|---------------------------------------|-------------|-----------------------------------------------------|---------------|--------------|-----------|------------------------|------------------------|
| <b>Vendor: SABiosciences</b>          |             |                                                     | (Catalogue #) |              |           |                        |                        |
| Human                                 | IL23R       | interleukin 23 receptor                             | PPH18331F     | 149          | 1841-1989 | Not provided by vendor | Not provided by vendor |
| Human                                 | IL17RA      | interleukin 17 receptor A                           | PPH00873A     | 84           | 807-890   | Not provided by vendor | Not provided by vendor |
| Human                                 | TGFB2       | Transforming growth factor, beta 2                  | PPH00524B     | 83           | 2558-2640 | Not provided by vendor | Not provided by vendor |
| Human                                 | SMAD3       | SMAD family member 3                                | PPH01921C     | 84           | 1346-1429 | Not provided by vendor | Not provided by vendor |
| Human                                 | STAT5B      | Signal Transducer and Activator of Transcription 5B | PPH01972F     | 154          | 4676-4829 | Not provided by vendor | Not provided by vendor |
| <b>Vendor: Real Time Primers, LCC</b> |             |                                                     |               |              |           |                        |                        |
| Human                                 | IL21R       | Interleukin 21 receptor                             | NM_021798     | 156          | 2227-2382 | GGAGCTGCAAGAAGTCCATA   | GGTAGCACAGCCAGAAGGTA   |
| Human                                 | IL22        | Interleukin 22                                      | NM_020525     | 187          | 479-665   | GAGGAATGTGCAAAAGCTGA   | GCTTTGGGGCATCTAATTGT   |
| Human                                 | IL6         | Interleukin 6                                       | NM_000600     | 167          | 549-715   | ATGCAATAACCACCCCTGAC   | GAGGTGCCCATGCTACATTT   |
| Human                                 | RORA        | RAR-related orphan receptor A                       | NM_134261     | 237          | 6081-6317 | TCATTTTGGAGTTGGGGTTA   | ACACAAGACTGACGAGCACA   |
| Human                                 | RORA        | RAR-related orphan receptor A                       | NM_134261     | 229          | 302-530   | TGCAAGATCTGTGGAGACAA   | ACATTCGGCCAAATTTTACA   |
| Human                                 | Runx1       | Runt-related transcription factor 1                 | NM_001754     | 175          | 4847-5021 | ACAGAGACATTGCCAACCAT   | CAGGACATTTGAGTGAACC    |
| Human                                 | IL10        | Interleukin 10                                      | NM_000572     | 285          | 326-611   | TTACCTGGAGGAGGTGATGC   | GCCACCCTGATGTCTCAGTT   |
| Human                                 | GAPDH       | Glyceraldehyde phosphate dehydrogenase              | NM_002046     | 238          | 362-2450  | GAGTCAACGGATTTGGTCGT   | TTGATTTTGGAGGGATCTCG   |
| Human                                 | TGFB2       | Transforming growth factor, beta 2                  | NM_003238     | 194          | 754-947   | AACAAGAGCAGAAGGCGAAT   | TGCCATCAATACCTGCAAAT   |
| Human                                 | SMAD3       | SMAD family member 3                                | NM_005902     | 170          | 5208-5377 | CCAGAACCAACCTCAACAC    | TCCTCTTGCGTACGTTTTTC   |
| Human                                 | TGFBR2      | Transforming growth factor, beta receptor II        | NM_001024847  | 163          | 2826-2988 | GGTTCCTGTGTGCCCTTATT   | TGCAACCCATGAAGGTAAAA   |
| Human                                 | CTLA4       | Cytotoxic T-lymphocyte-associated protein 4         | NM_005214     | 217          | 392-608   | AGCCAGGTGACTGAAGTCTG   | CATAAATCTGGTTCCGTTG    |
| Human                                 | IL17A       | Interleukin 17A                                     | NM_002190     | 261          | 1389-1649 | CTCGATTTACATGCCTTCA    | GAGGGGCCTTAATCTCCAAA   |
| Human                                 | IL23R       | interleukin 23 receptor                             | NM_144701     | 191          | 336-526   | CAGCTCGGCTTTGGTATAAA   | ATTCCAGGTGCAAGTCATGT   |
| Human                                 | IL23R       | interleukin 23 receptor                             | NM_144701     | 172          | 2594-2765 | TGAGGTCAGGAGTTCGAGTC   | AATCTCAGCTCAGTGCAACC   |
| Human                                 | IFNG        | Interferon, gamma                                   | NM_000619     | 198          | 912-1109  | TCCCATGGGTTGTGTGTTTA   | AAGCACCAGGCATGAAATCT   |
| Human                                 | IL2         | Interleukin 2                                       | NM_000586     | 207          | 55-261    | AATGTACAGGATGCAACTCC   | TTCTTGGGCATGTAAAATT    |
| Human                                 | IL5         | Interleukin 5                                       | NM_000879     | 237          | 140-376   | GACCTTGGCACTGCTTTCTA   | CTCCGTCTTTCTCTCCACA    |
| Human                                 | IL4         | Interleukin 4                                       | NM_000589     | 125          | 200-324   | CCCCAAGTACTGACAATCT    | AGGAGAAGCTAACGATGCAA   |
| Human                                 | IL18        | Interleukin 18 (interferon-gamma-inducing factor)   | NM_001562     | 177          | 61-238    | GGAATTGTCTCCCAGTGCAT   | ACTGGTTCAGCAGCCATCTT   |

**Table S3 Scores of TH1, TH2, Treg, and TH17 pathway gene expression in PDAC TIL analyzed by quantitative real-time RT-PCR.**

| <b>Table S3 Part 1/6</b> |                         |                      |                      |                      |                      |                           |                      |                      |                      |                      |                      |
|--------------------------|-------------------------|----------------------|----------------------|----------------------|----------------------|---------------------------|----------------------|----------------------|----------------------|----------------------|----------------------|
|                          | <b>OS&gt;3 yr (n=5)</b> |                      |                      |                      |                      | <b>OS&lt;1.5 yr (n=6)</b> |                      |                      |                      |                      |                      |
| <b>Gene ID</b>           | <b>7.012<br/>CD4</b>    | <b>7.011<br/>CD4</b> | <b>7.019<br/>CD4</b> | <b>7.024<br/>CD4</b> | <b>7.007<br/>CD4</b> | <b>7.005<br/>CD4</b>      | <b>7.036<br/>CD4</b> | <b>7.006<br/>CD4</b> | <b>7.017<br/>CD4</b> | <b>7.029<br/>CD4</b> | <b>7.030<br/>CD4</b> |
| IFNG                     | 1.5                     | 1.5                  | 1.5                  | 4                    | 1.5                  | 4                         | 4                    | 1.5                  | 1.5                  | 1.5                  | 1.5                  |
| IL2                      | 2                       | 2                    | 2                    | 4                    | 4                    | 2                         | 2                    | 2                    | 2                    | 4                    | 2                    |
| IL18                     | 2                       | 2                    | 1                    | 2                    | 3                    | 3                         | 4                    | 3                    | 3                    | 1                    | 1                    |
| <b>TH1_average</b>       | <b>2</b>                | <b>2</b>             | <b>2</b>             | <b>3</b>             | <b>3</b>             | <b>3</b>                  | <b>3</b>             | <b>2</b>             | <b>2</b>             | <b>2</b>             | <b>2</b>             |
| IL4                      | 2                       | 2                    | 4                    | 2                    | 2                    | 2                         | 2                    | 2                    | 2                    | 2                    | 2                    |
| IL6                      | 1                       | 1                    | 4                    | 1                    | 1                    | 1                         | 1                    | 3                    | 1                    | 4                    | 4                    |
| IL10                     | 1                       | 1                    | 1                    | 1                    | 3                    | 3                         | 2                    | 4                    | 3                    | 2                    | 4                    |
| STAT5b                   | 3                       | 2                    | 4                    | 1                    | 4                    | 4                         | 1                    | 1                    | 4                    | 3                    | 2                    |
| <b>TH2_average</b>       | <b>2</b>                | <b>2</b>             | <b>3</b>             | <b>1</b>             | <b>3</b>             | <b>3</b>                  | <b>2</b>             | <b>3</b>             | <b>3</b>             | <b>3</b>             | <b>3</b>             |
| IL17A                    | 2                       | 2                    | 2                    | 2                    | 2                    | 2                         | 4                    | 2                    | 2                    | 4                    | 4                    |
| IL22                     | 2                       | 2                    | 4                    | 2                    | 2                    | 2                         | 2                    | 4                    | 2                    | 2                    | 2                    |
| IL17RA                   | 1.5                     | 1.5                  | 1.5                  | 3                    | 4                    | 1.5                       | 1.5                  | 4                    | 1.5                  | 1.5                  | 1.5                  |
| IL21R                    | 1                       | 1                    | 4                    | 1                    | 4                    | 2                         | 2                    | 1                    | 4                    | 1                    | 3                    |
| IL23R                    | 4                       | 4                    | 2                    | 2                    | 2                    | 2                         | 2                    | 2                    | 4                    | 2                    | 2                    |
| RORA                     | 1                       | 2                    | 3                    | 4                    | 4                    | 3                         | 2                    | 4                    | 4                    | 1                    | 1                    |
| <b>TH17_average</b>      | <b>2</b>                | <b>2</b>             | <b>3</b>             | <b>2</b>             | <b>3</b>             | <b>2</b>                  | <b>2</b>             | <b>3</b>             | <b>3</b>             | <b>2</b>             | <b>2</b>             |
| STAT5b                   | 3                       | 2                    | 4                    | 1                    | 4                    | 4                         | 1                    | 1                    | 4                    | 3                    | 2                    |
| CTLA4                    | 2                       | 2                    | 1                    | 3                    | 4                    | 3                         | 4                    | 4                    | 1                    | 3                    | 4                    |
| IL10                     | 1                       | 1                    | 1                    | 1                    | 3                    | 3                         | 2                    | 4                    | 3                    | 2                    | 4                    |
| TGFB2                    | 1                       | 1                    | 4                    | 1                    | 1                    | 4                         | 3                    | 3                    | 3                    | 3                    | 4                    |
| <b>Treg_average</b>      | <b>2</b>                | <b>2</b>             | <b>3</b>             | <b>2</b>             | <b>3</b>             | <b>4</b>                  | <b>3</b>             | <b>3</b>             | <b>3</b>             | <b>3</b>             | <b>4</b>             |



| <b>Table S3 Part 2/6</b> |                         |                      |                      |                      |                      |                           |                      |                      |                      |                      |                      |
|--------------------------|-------------------------|----------------------|----------------------|----------------------|----------------------|---------------------------|----------------------|----------------------|----------------------|----------------------|----------------------|
|                          | <b>OS&gt;3 yr (n=5)</b> |                      |                      |                      |                      | <b>OS&lt;1.5 yr (n=6)</b> |                      |                      |                      |                      |                      |
| <b>Gene ID</b>           | <b>7.012<br/>CD8</b>    | <b>7.011<br/>CD8</b> | <b>7.019<br/>CD8</b> | <b>7.024<br/>CD8</b> | <b>7.007<br/>CD8</b> | <b>7.005<br/>CD8</b>      | <b>7.036<br/>CD8</b> | <b>7.006<br/>CD8</b> | <b>7.017<br/>CD8</b> | <b>7.029<br/>CD8</b> | <b>7.030<br/>CD8</b> |
| GZMB                     | 1                       | 3                    | 1                    | 3                    | 1                    | 3                         | 4                    | 2                    | 1                    | 1                    | 2                    |
| PRF1                     | 3                       | 2                    | 2                    | 1                    | 3                    | 4                         | 4                    | 3                    | 2                    | 4                    | 2                    |
| IFNG                     | 3                       | 3                    | 1                    | 2                    | 1                    | 1                         | 4                    | 2                    | 1                    | 4                    | 4                    |
| IL2                      | 4                       | 1                    | 1                    | 3                    | 1                    | 3                         | 4                    | 1                    | 1                    | 3                    | 1                    |
| TNF                      | 1.5                     | 1.5                  | 1.5                  | 3                    | 1.5                  | 3                         | 1.5                  | 1.5                  | 4                    | 1.5                  | 3                    |
| <b>TH1_average</b>       | <b>3</b>                | <b>2</b>             | <b>1</b>             | <b>2</b>             | <b>2</b>             | <b>3</b>                  | <b>4</b>             | <b>2</b>             | <b>2</b>             | <b>3</b>             | <b>2</b>             |
|                          |                         |                      |                      |                      |                      |                           |                      |                      |                      |                      |                      |
| IL4                      | 2                       | 2                    | 2                    | 4                    | 2                    | 2                         | 4                    | 2                    | 2                    | 2                    | 2                    |
| IL5                      | 2                       | 2                    | 2                    | 2                    | 2                    | 2                         | 2                    | 2                    | 2                    | 2                    | 4                    |
| <b>TH2_average</b>       | <b>2</b>                | <b>2</b>             | <b>2</b>             | <b>3</b>             | <b>2</b>             | <b>2</b>                  | <b>3</b>             | <b>2</b>             | <b>2</b>             | <b>2</b>             | <b>3</b>             |
|                          |                         |                      |                      |                      |                      |                           |                      |                      |                      |                      |                      |
| TGFBR2                   | 4                       | 1                    | 1                    | 1                    | 2                    | 1                         | 1                    | 3                    | 2                    | 4                    | 4                    |
| IL17A                    | 4                       | 2                    | 2                    | 2                    | 2                    | 2                         | 2                    | 2                    | 2                    | 2                    | 4                    |
| IL18                     | 1                       | 1                    | 4                    | 2                    | 3                    | 2                         | 4                    | 1                    | 1                    | 3                    | 4                    |
| <b>TH17_average</b>      | <b>3</b>                | <b>1</b>             | <b>2</b>             | <b>2</b>             | <b>2</b>             | <b>2</b>                  | <b>2</b>             | <b>2</b>             | <b>2</b>             | <b>3</b>             | <b>4</b>             |
|                          |                         |                      |                      |                      |                      |                           |                      |                      |                      |                      |                      |
| CTLA4                    | 3                       | 2                    | 4                    | 1                    | 3                    | 2                         | 4                    | 3                    | 2                    | 3                    | 1                    |
| TGFBR2                   | 4                       | 1                    | 1                    | 1                    | 2                    | 1                         | 1                    | 3                    | 2                    | 4                    | 4                    |
| <b>Treg_average</b>      | <b>4</b>                | <b>2</b>             | <b>3</b>             | <b>1</b>             | <b>3</b>             | <b>2</b>                  | <b>3</b>             | <b>3</b>             | <b>2</b>             | <b>4</b>             | <b>3</b>             |

**Table S3 Part 3/6**

| Gene ID              | Enhanced mesotheline-specific T cell response (n=6) |           |           |           |           |           | Unenhanced mesotheline-specific T cell response (n=7) |           |           |           |           |           |           |
|----------------------|-----------------------------------------------------|-----------|-----------|-----------|-----------|-----------|-------------------------------------------------------|-----------|-----------|-----------|-----------|-----------|-----------|
|                      | 7.036 CD4                                           | 7.035 CD4 | 7.030 CD4 | 7.029 CD4 | 7.007 CD4 | 7.034 CD4 | 7.004 CD4                                             | 7.005 CD4 | 7.019 CD4 | 7.048 CD4 | 7.058 CD4 | 7.015 CD4 | 7.038 CD4 |
| IFNG                 | 4                                                   | 1.5       | 1.5       | 1.5       | 1.5       | 1.5       | 1.5                                                   | 4         | 1.5       | 1.5       | 1.5       | 1.5       | 1.5       |
| IL2                  | 2                                                   | 2         | 2         | 4         | 4         | 4         | 2                                                     | 2         | 2         | 2         | 2         | 2         | 2         |
| IL18                 | 4                                                   | 2         | 1         | 1         | 3         | 3         | 4                                                     | 3         | 1         | 4         | 4         | 4         | 1         |
| <b>TH1_ average</b>  | <b>3</b>                                            | <b>2</b>  | <b>2</b>  | <b>2</b>  | <b>3</b>  | <b>3</b>  | <b>3</b>                                              | <b>3</b>  | <b>2</b>  | <b>3</b>  | <b>3</b>  | <b>3</b>  | <b>2</b>  |
|                      |                                                     |           |           |           |           |           |                                                       |           |           |           |           |           |           |
| IL4                  | 2                                                   | 2         | 2         | 2         | 2         | 4         | 2                                                     | 2         | 4         | 2         | 2         | 2         | 2         |
| IL6                  | 1                                                   | 1         | 4         | 4         | 1         | 3         | 3                                                     | 1         | 4         | 3         | 3         | 1         | 4         |
| IL10                 | 2                                                   | 1         | 4         | 2         | 3         | 2         | 4                                                     | 3         | 1         | 2         | 3         | 1         | 4         |
| STAT5b               | 1                                                   | 3         | 2         | 3         | 4         | 2         | 2                                                     | 4         | 4         | 2         | 1         | 4         | 2         |
| <b>TH2_ average</b>  | <b>2</b>                                            | <b>2</b>  | <b>3</b>  | <b>3</b>  | <b>3</b>  | <b>3</b>  | <b>3</b>                                              | <b>3</b>  | <b>3</b>  | <b>2</b>  | <b>2</b>  | <b>2</b>  | <b>3</b>  |
|                      |                                                     |           |           |           |           |           |                                                       |           |           |           |           |           |           |
| IL17A                | 4                                                   | 2         | 4         | 4         | 2         | 2         | 2                                                     | 2         | 2         | 2         | 2         | 2         | 2         |
| IL22                 | 2                                                   | 2         | 2         | 2         | 2         | 2         | 2                                                     | 2         | 4         | 2         | 2         | 2         | 2         |
| IL17RA               | 1.5                                                 | 4         | 1.5       | 1.5       | 4         | 1.5       | 1.5                                                   | 1.5       | 1.5       | 4         | 1.5       | 1.5       | 1.5       |
| IL21R                | 2                                                   | 4         | 3         | 1         | 4         | 2         | 3                                                     | 2         | 4         | 2         | 4         | 2         | 3         |
| IL23R                | 2                                                   | 2         | 2         | 2         | 2         | 4         | 2                                                     | 2         | 2         | 2         | 4         | 2         | 2         |
| RORA                 | 2                                                   | 4         | 1         | 1         | 4         | 2         | 2                                                     | 3         | 3         | 1         | 1         | 3         | 4         |
| <b>TH17_ average</b> | <b>2</b>                                            | <b>3</b>  | <b>2</b>  | <b>2</b>  | <b>3</b>  | <b>2</b>  | <b>2</b>                                              | <b>2</b>  | <b>3</b>  | <b>2</b>  | <b>2</b>  | <b>2</b>  | <b>2</b>  |
|                      |                                                     |           |           |           |           |           |                                                       |           |           |           |           |           |           |
| STAT5b               | 1                                                   | 3         | 2         | 3         | 4         | 2         | 2                                                     | 4         | 4         | 2         | 1         | 4         | 2         |
| CTLA4                | 4                                                   | 1         | 4         | 3         | 4         | 2         | 3                                                     | 3         | 1         | 2         | 3         | 3         | 4         |
| IL10                 | 2                                                   | 1         | 4         | 2         | 3         | 2         | 4                                                     | 3         | 1         | 2         | 3         | 1         | 4         |
| TGFB2                | 3                                                   | 3         | 4         | 3         | 1         | 1         | 4                                                     | 4         | 4         | 1         | 1         | 1         | 4         |
| <b>Treg_ average</b> | <b>3</b>                                            | <b>2</b>  | <b>4</b>  | <b>3</b>  | <b>3</b>  | <b>2</b>  | <b>3</b>                                              | <b>4</b>  | <b>3</b>  | <b>2</b>  | <b>2</b>  | <b>2</b>  | <b>4</b>  |

| Gene ID              | Enhanced mesotheline-specific T cell response (n=7) |           |           |           |           |           | Unenhanced mesotheline-specific T cell response (n=7) |           |           |           |           |           |           |
|----------------------|-----------------------------------------------------|-----------|-----------|-----------|-----------|-----------|-------------------------------------------------------|-----------|-----------|-----------|-----------|-----------|-----------|
|                      | 7.036 CD8                                           | 7.035 CD8 | 7.030 CD8 | 7.029 CD8 | 7.007 CD8 | 7.034 CD8 | 7.004 CD8                                             | 7.005 CD8 | 7.019 CD8 | 7.048 CD8 | 7.058 CD8 | 7.015 CD8 | 7.038 CD8 |
| GZMB                 | 4                                                   | 4         | 2         | 1         | 1         | 4         | 2                                                     | 3         | 1         | 3         | 4         | 1         | 1         |
| PRF1                 | 4                                                   | 1         | 2         | 4         | 3         | 3         | 1                                                     | 4         | 2         | 1         | 3         | 2         | 1         |
| IFNG                 | 4                                                   | 4         | 4         | 4         | 1         | 2         | 1                                                     | 1         | 1         | 2         | 4         | 4         | 1         |
| IL2                  | 4                                                   | 4         | 1         | 3         | 1         | 3         | 1                                                     | 3         | 1         | 4         | 4         | 4         | 3         |
| TNF                  | 1.5                                                 | 3         | 3         | 1.5       | 1.5       | 3         | 4                                                     | 3         | 1.5       | 4         | 4         | 1.5       | 1.5       |
| <b>TH1_ average</b>  | <b>4</b>                                            | <b>3</b>  | <b>2</b>  | <b>3</b>  | <b>2</b>  | <b>3</b>  | <b>2</b>                                              | <b>3</b>  | <b>1</b>  | <b>3</b>  | <b>4</b>  | <b>3</b>  | <b>2</b>  |
|                      |                                                     |           |           |           |           |           |                                                       |           |           |           |           |           |           |
| IL4                  | 4                                                   | 4         | 2         | 2         | 2         | 2         | 2                                                     | 2         | 2         | 2         | 2         | 2         | 2         |
| IL5                  | 2                                                   | 2         | 4         | 2         | 2         | 2         | 2                                                     | 2         | 2         | 2         | 2         | 2         | 2         |
| <b>TH2_ average</b>  | <b>3</b>                                            | <b>3</b>  | <b>3</b>  | <b>2</b>  | <b>2</b>  | <b>2</b>  | <b>2</b>                                              | <b>2</b>  | <b>2</b>  | <b>2</b>  | <b>2</b>  | <b>2</b>  | <b>2</b>  |
|                      |                                                     |           |           |           |           |           |                                                       |           |           |           |           |           |           |
| TGFBR2               | 1                                                   | 3         | 4         | 4         | 2         | 1         | 1                                                     | 1         | 1         | 4         | 4         | 1         | 1         |
| IL17A                | 2                                                   | 2         | 4         | 2         | 2         | 2         | 4                                                     | 2         | 2         | 2         | 2         | 2         | 2         |
| IL18                 | 4                                                   | 2         | 4         | 3         | 3         | 4         | 3                                                     | 2         | 4         | 3         | 4         |           | 3         |
| <b>TH17_ average</b> | <b>2</b>                                            | <b>2</b>  | <b>4</b>  | <b>3</b>  | <b>2</b>  | <b>2</b>  | <b>3</b>                                              | <b>2</b>  | <b>2</b>  | <b>3</b>  | <b>3</b>  | <b>2</b>  | <b>2</b>  |
|                      |                                                     |           |           |           |           |           |                                                       |           |           |           |           |           |           |
| CTLA4                | 4                                                   | 1         | 1         | 3         | 3         | 4         | 4                                                     | 2         | 4         | 1         | 4         | 3         | 2         |
| TGFBR2               | 1                                                   | 3         | 4         | 4         | 2         | 1         | 1                                                     | 1         | 1         | 4         | 4         | 1         | 1         |
| <b>Treg_ average</b> | <b>3</b>                                            | <b>2</b>  | <b>3</b>  | <b>4</b>  | <b>3</b>  | <b>3</b>  | <b>3</b>                                              | <b>2</b>  | <b>3</b>  | <b>3</b>  | <b>4</b>  | <b>2</b>  | <b>2</b>  |

|                     | <b>High CD8/Foxp3 ratio (&gt; 5) (n=5)</b> |                      |                      |                      |                      | <b>Low CD8/Foxp3 ratio (&lt;5) (n=3)</b> |                      |                      |
|---------------------|--------------------------------------------|----------------------|----------------------|----------------------|----------------------|------------------------------------------|----------------------|----------------------|
| <b>Gene ID</b>      | <b>7.012<br/>CD4</b>                       | <b>7.006<br/>CD4</b> | <b>7.035<br/>CD4</b> | <b>7.005<br/>CD4</b> | <b>7.004<br/>CD4</b> | <b>7.011<br/>CD4</b>                     | <b>7.017<br/>CD4</b> | <b>7.015<br/>CD4</b> |
| IFNG                | 1.5                                        | 1.5                  | 1.5                  | 4                    | 1.5                  | 1.5                                      | 1.5                  | 1.5                  |
| IL2                 | 2                                          | 2                    | 2                    | 2                    | 2                    | 2                                        | 2                    | 2                    |
| IL18                | 2                                          | 3                    | 2                    | 3                    | 4                    | 2                                        | 3                    | 4                    |
| <b>TH1_average</b>  | <b>2</b>                                   | <b>2</b>             | <b>2</b>             | <b>3</b>             | <b>3</b>             | <b>2</b>                                 | <b>2</b>             | <b>3</b>             |
|                     |                                            |                      |                      |                      |                      |                                          |                      |                      |
| IL4                 | 2                                          | 2                    | 2                    | 2                    | 2                    | 2                                        | 2                    | 2                    |
| IL6                 | 1                                          | 3                    | 1                    | 1                    | 3                    | 1                                        | 1                    | 1                    |
| IL10                | 1                                          | 4                    | 1                    | 3                    | 4                    | 1                                        | 3                    | 1                    |
| STAT5b              | 3                                          | 1                    | 3                    | 4                    | 2                    | 2                                        | 4                    | 4                    |
| <b>TH2_average</b>  | <b>2</b>                                   | <b>3</b>             | <b>2</b>             | <b>3</b>             | <b>3</b>             | <b>2</b>                                 | <b>3</b>             | <b>2</b>             |
|                     |                                            |                      |                      |                      |                      |                                          |                      |                      |
| IL17A               | 2                                          | 2                    | 2                    | 2                    | 2                    | 2                                        | 2                    | 2                    |
| IL22                | 2                                          | 4                    | 2                    | 2                    | 2                    | 2                                        | 2                    | 2                    |
| IL17RA              | 1.5                                        | 4                    | 4                    | 1.5                  | 1.5                  | 1.5                                      | 1.5                  | 1.5                  |
| IL21R               | 1                                          | 1                    | 4                    | 2                    | 3                    | 1                                        | 4                    | 2                    |
| IL23R               | 4                                          | 2                    | 2                    | 2                    | 2                    | 4                                        | 4                    | 2                    |
| RORA                | 1                                          | 4                    | 4                    | 3                    | 2                    | 2                                        | 4                    | 3                    |
| <b>TH17_average</b> | <b>2</b>                                   | <b>3</b>             | <b>3</b>             | <b>2</b>             | <b>2</b>             | <b>2</b>                                 | <b>3</b>             | <b>2</b>             |
|                     |                                            |                      |                      |                      |                      |                                          |                      |                      |
| STAT5b              | 3                                          | 1                    | 3                    | 4                    | 2                    | 2                                        | 4                    | 4                    |
| CTLA4               | 2                                          | 4                    | 1                    | 3                    | 3                    | 2                                        | 1                    | 3                    |
| IL10                | 1                                          | 4                    | 1                    | 3                    | 4                    | 1                                        | 3                    | 1                    |
| TGFB2               | 1                                          | 3                    | 3                    | 4                    | 4                    | 1                                        | 3                    | 1                    |
| <b>Treg_average</b> | <b>2</b>                                   | <b>3</b>             | <b>2</b>             | <b>4</b>             | <b>3</b>             | <b>2</b>                                 | <b>3</b>             | <b>2</b>             |

| <b>Table S3 Part 6/6</b> |                                            |                      |                      |                      |                      |                                          |                      |                      |
|--------------------------|--------------------------------------------|----------------------|----------------------|----------------------|----------------------|------------------------------------------|----------------------|----------------------|
|                          | <b>High CD8/Foxp3 ratio (&gt; 5) (n=5)</b> |                      |                      |                      |                      | <b>Low CD8/Foxp3 ratio (&lt;5) (n=3)</b> |                      |                      |
| <b>Gene ID</b>           | <b>7.012<br/>CD8</b>                       | <b>7.006<br/>CD8</b> | <b>7.035<br/>CD8</b> | <b>7.005<br/>CD8</b> | <b>7.004<br/>CD8</b> | <b>7.011<br/>CD8</b>                     | <b>7.017<br/>CD8</b> | <b>7.015<br/>CD8</b> |
| GZMB                     | 1                                          | 2                    | 4                    | 3                    | 2                    | 3                                        | 1                    | 1                    |
| PRF1                     | 3                                          | 3                    | 1                    | 4                    | 1                    | 2                                        | 2                    | 2                    |
| IFNG                     | 3                                          | 2                    | 4                    | 1                    | 1                    | 3                                        | 1                    | 4                    |
| IL2                      | 4                                          | 1                    | 4                    | 3                    | 1                    | 1                                        | 1                    | 4                    |
| TNF                      | 1.5                                        | 1.5                  | 3                    | 3                    | 4                    | 1.5                                      | 4                    | 1.5                  |
| <b>TH1_average</b>       | <b>3</b>                                   | <b>2</b>             | <b>3</b>             | <b>3</b>             | <b>2</b>             | <b>2</b>                                 | <b>2</b>             | <b>3</b>             |
|                          |                                            |                      |                      |                      |                      |                                          |                      |                      |
| IL4                      | 2                                          | 2                    | 4                    | 2                    | 2                    | 2                                        | 2                    | 2                    |
| IL5                      | 2                                          | 2                    | 2                    | 2                    | 2                    | 2                                        | 2                    | 2                    |
| <b>TH2_average</b>       | <b>2</b>                                   | <b>2</b>             | <b>3</b>             | <b>2</b>             | <b>2</b>             | <b>2</b>                                 | <b>2</b>             | <b>2</b>             |
|                          |                                            |                      |                      |                      |                      |                                          |                      |                      |
| TGFBR2                   | 4                                          | 3                    | 3                    | 1                    | 1                    | 1                                        | 2                    | 1                    |
| IL17A                    | 4                                          | 2                    | 2                    | 2                    | 4                    | 2                                        | 2                    | 2                    |
| IL18                     | 1                                          | 1                    | 2                    | 2                    | 3                    | 1                                        | 1                    |                      |
| <b>TH17_average</b>      | <b>3</b>                                   | <b>2</b>             | <b>2</b>             | <b>2</b>             | <b>3</b>             | <b>1</b>                                 | <b>2</b>             | <b>2</b>             |
|                          |                                            |                      |                      |                      |                      |                                          |                      |                      |
| CTLA4                    | 3                                          | 3                    | 1                    | 2                    | 4                    | 2                                        | 2                    | 3                    |
| TGFBR2                   | 4                                          | 3                    | 3                    | 1                    | 1                    | 1                                        | 2                    | 1                    |
| <b>Treg_average</b>      | <b>4</b>                                   | <b>3</b>             | <b>2</b>             | <b>2</b>             | <b>3</b>             | <b>2</b>                                 | <b>2</b>             | <b>2</b>             |

**Table S4 Numbers of TIL specimens with detectable expression of immune related genes**

| <b>Gene Name</b> | <b>CD4+ (n=20)</b> | <b>CD8+ (n=20)</b> | <b>non-T (n=7)</b> | <b>CD19+ (n=5)</b> |
|------------------|--------------------|--------------------|--------------------|--------------------|
| IFNg             | 3                  | 14                 | 3                  | 1                  |
| IL2              | 5                  | 11                 | NT                 | NT                 |
| IL18             | 17                 | 16                 | NT                 | NT                 |
| IL5              | 0                  | 1                  | NT                 | NT                 |
| IL4              | 1                  | 5                  | NT                 | NT                 |
| IL6              | 11                 | NT                 | 7                  | 3                  |
| IL10             | 14                 | NT                 | 7                  | 5                  |
| STAT5b           | 20                 | NT                 | NT                 | NT                 |
| SMAD3            | 20                 | NT                 | NT                 | NT                 |
| TGFB2            | 10                 | NT                 | 6                  | 2                  |
| TGFBR2           | 14                 | 11                 | NT                 | NT                 |
| CTLA4            | 20                 | 20                 | NT                 | NT                 |
| IL22             | 7                  | NT                 | 0                  | 0                  |
| IL17A            | 3                  | 3                  | 1                  | 0                  |
| IL17RA           | 6                  | NT                 | 2                  | 2                  |
| IL21R            | 11                 | NT                 | NT                 | NT                 |
| IL23R            | 5                  | NT                 | 7                  | 5                  |
| IL23A            | 0                  | 0                  | 7                  | 5                  |
| RUNX1            | 20                 | NT                 | NT                 | NT                 |
| RORA             | 20                 | NT                 | NT                 | NT                 |
| LAG3             | NT                 | 19                 | NT                 | NT                 |
| PDCD1            | NT                 | 20                 | NT                 | NT                 |
| CD69             | NT                 | 20                 | NT                 | NT                 |
| TNF              | NT                 | 9                  | NT                 | NT                 |
| FASLG            | NT                 | 20                 | NT                 | NT                 |
| GZMB             | NT                 | 13                 | NT                 | NT                 |
| PRF1             | NT                 | 20                 | NT                 | NT                 |
| IL1A             | NT                 | NT                 | 7                  | 5                  |

### **References for Supplemental data**

1. Lutz E, Yeo CJ, Lillemoe KD, et al. A lethally irradiated allogeneic granulocyte-macrophage colony stimulating factor-secreting tumor vaccine for pancreatic adenocarcinoma. A Phase II trial of safety, efficacy, and immune activation. *Annals of surgery* 2011;253:328-35.
